# Supplementary material
Source: PubMed Central journal article supplement (PMC4260590)
Supplement: pnas.201412663SI.pdf [file pnas.201412663SI.pdf]

# Supporting Information

Schwartz et al. 10.1073/pnas.1412663111

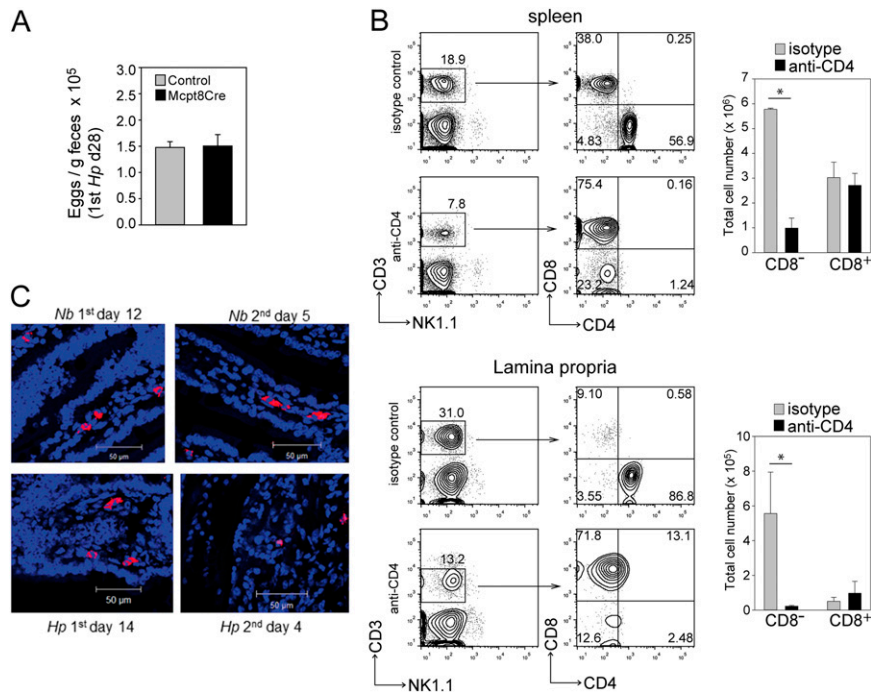

**Fig. S1.** Immunofluorescence staining of basophils after helminth infection and egg burden during primary infection with *Hp* (also see Fig. 1). (A) Number of *Hp* eggs in the feces of infected Mcpt8Cre mice (black bar) and control mice (gray bar) 28 d after the primary infection. The bar graph shows the mean + SEM from two pooled experiments with 10 mice per group. (B, Left) Contour plots show the frequency of total T cells (CD3<sup>+</sup>NK1.1<sup>-</sup>) and expression of CD4 and CD8 on gated CD3<sup>+</sup>NK1.1<sup>-</sup> cells in the spleen (Upper) and lamina propria (Lower) of CD4-depleted and isotype control-injected mice 4 d after the second infection with *Hp*. (Right) Bar graphs show the mean + SD of total CD8<sup>-</sup> T cells (including CD4<sup>+</sup> T cells that were not depleted) and CD8<sup>+</sup> T cells from two mice per group. (C) Cryosections from fixed small intestinal tissue were stained with anti-mMCP-8 (red) and DAPI (blue). The pictures show enlarged views of the immunofluorescence staining depicted in Fig. 1H.

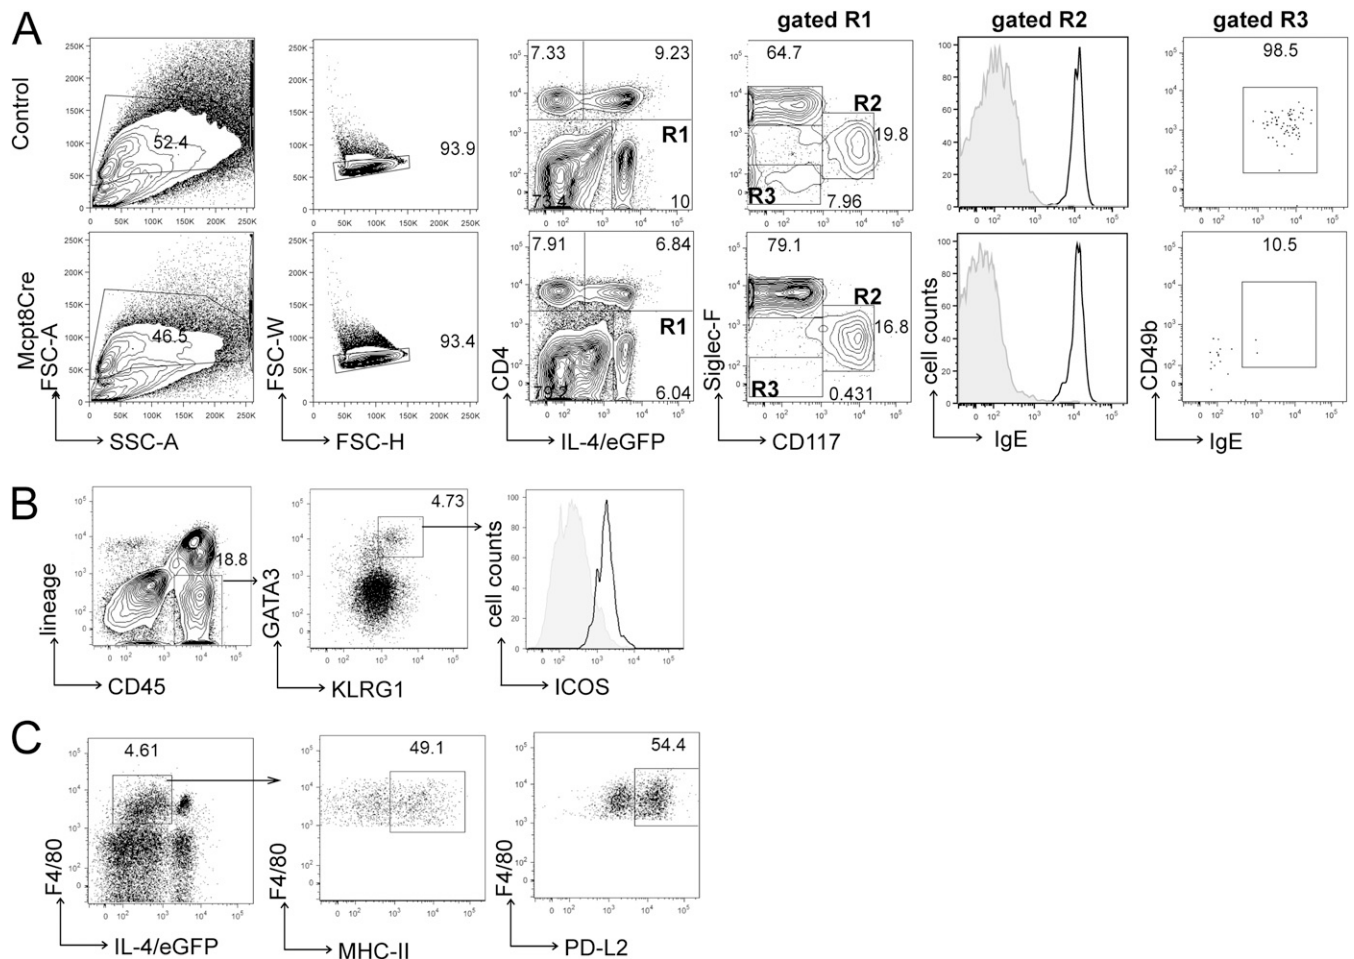

**Fig. S2.** Flow cytometric gating strategy used to identify cell populations shown in Fig. 2A. (A) Contour plots and histograms outline the gating strategy used to identify Th2 cells ( $CD4^+IL-4/eGFP^+$ ), eosinophils ( $CD4^-IL-4/eGFP^+Siglec-F^+$ ), mast cells ( $CD4^-IL-4/eGFP^+Siglec-F^{lo}CD117^+IgE^+$ ), and basophils ( $CD4^-IL-4/eGFP^+Siglec-F^-CD117^-CD49b^+IgE^+$ ) isolated from the lamina propria of control (*Upper*) and *Mcpt8Cre* (*Lower*) mice infected with *Hp*. The histogram shows IgE staining on mast cells (black line) compared with eosinophils (shaded gray area). (B) Contour, dot plots, and histograms outline the gating strategy used to identify type 2 innate lymphoid cells (lineage $^-CD45^+GATA3^+KLRG1^+ICOS^+$ ) in the lamina propria 4 d after the second infection with *Hp*. The shaded histogram shows isotype control staining. (C) AAMs were identified as  $F4/80^+IL-4/eGFP^+MHCII^{hi}PD-L2^+$ . Numbers adjacent to the gates indicate the frequency of the parental gate. Leukocyte singlets always were pregated based on forward and side scatter characteristics as depicted in A.

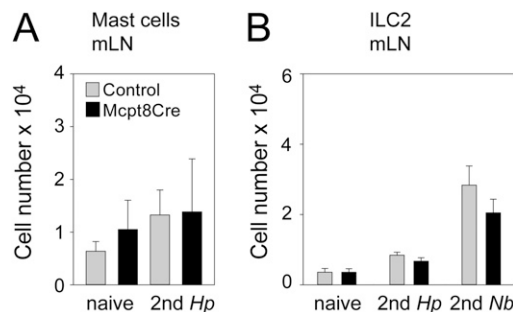

**Fig. S3.** Numbers of mast cells and ILC2s after the second infection with *Hp* (also see Fig. 2). (A) Total number of mast cells in mLN from naive control mice (gray bars) and *Mcpt8Cre* mice (black bars) and 4 d after the second infection with *Hp*. (B) Total number of ILC2s in mLN from control mice (gray bars) and *Mcpt8Cre* mice (black bars) before infection, 4 d after the second infection with *Hp*, or 5 d after the second infection with *Nb*. Bar graphs show the mean + SD from one experiment with four mice per group (A) and the mean + SEM from pooled experiments with four to six mice per group (B).

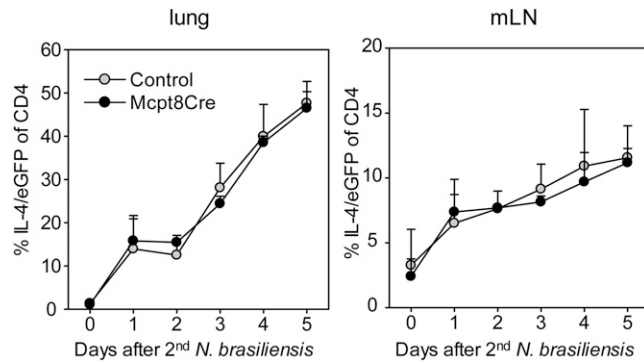

**Fig. 54.** Basophils are dispensable for Th2 polarization during the second infection with *Nb* (also see Fig. 3). Frequency of IL-4/eGFP<sup>+</sup> cells among CD4 T cells in the lung and mLN from control mice (gray symbols) and Mcpt8Cre mice (black symbols) at the indicated time points after the second infection with *Nb*. Plots show the mean + SD from one experiment with two mice per group per time point.

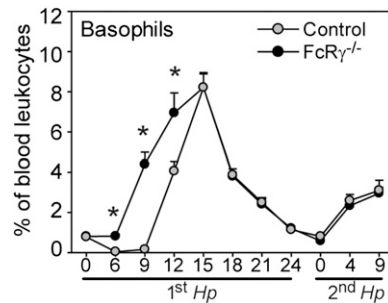

**Fig. 55.** Basophils in FcR $\gamma^{-/-}$  mice expand during the first and second *Hp* infection (also see Fig. 4). Frequency of basophils in the blood of FcR $\gamma^{-/-}$  mice (black symbols) and control mice (gray symbols) at the indicated time points after *Hp* infection. Plots show the mean + SEM from two pooled experiments with 10 mice per group. \* $P < 0.05$ .

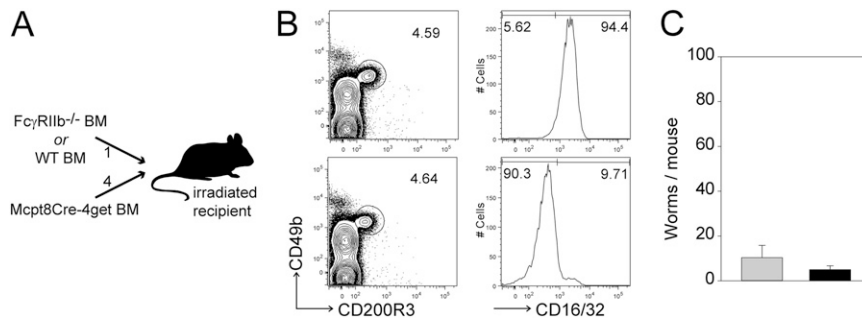

**Fig. 56.** Fc $\gamma$ RIIb on basophils is dispensable for protective immunity against *Hp* (also see Fig. 5). (A) Schematic of the generation of MBMCs. Mcpt8Cre-4get BM was mixed at a ratio of 4:1 with BM from either WT mice (CD45.1) or Fc $\gamma$ RIIb<sup>-/-</sup> mice and was injected i.v. into lethally irradiated recipient mice to create mice with normal (BasoWT) or Fc $\gamma$ RIIb-deficient (BasoFc $\gamma$ RIIb<sup>-/-</sup>) basophils. (B) Dot plots show basophils in the blood of chimeric mice described in A 4 d after second infection. Numbers indicate the frequency of gated cells. Histograms were gated on basophils and show staining with anti-CD16/32-antibody. (C) Number of adult worms in the small intestines of MBMCs 12 d after the second infection (grey bar: BasoWT; black bar: Baso-4-13ko). The graph shows the mean + SD;  $n = 3$  mice per group.

**Table S1. Antibodies used for flow cytometry**

| Antigen               | Conjugate       | Clone           | Source                    |
|-----------------------|-----------------|-----------------|---------------------------|
| CD4                   | PerCP-Cy5.5     | RM4-5           | eBioscience               |
| CD4                   | APC-eFluor 780  | RM4-5           | eBioscience               |
| CD49b                 | Alexa Fluor 647 | HMa2            | BioLegend                 |
| CD200R3               | PE              | Ba13            | BioLegend                 |
| IgE                   | FITC            | R35-72          | BD                        |
| Siglec-F              | PE              | E50-2440        | BD                        |
| IL-4                  | PE              | 11B11           | eBioscience               |
| CD16/32               | PE-Cy7          | 93              | eBioscience               |
| CD45.1                | FITC            | A20             | Miltenyi                  |
| CD45.2                | PerCP-Cy5.5     | 104             | eBioscience               |
| PD-L2                 | PE              | TY25            | eBioscience               |
| MHCII                 | APC-Cy7         | M5/<br>114.15.2 | BioLegend                 |
| F4/80                 | APC             | BM8             | eBioscience               |
| CD3                   | Biotin, APC     | 145-2C11        | eBioscience               |
| CD8a                  | Biotin, APC     | 53-6.7          | eBioscience               |
| CD45R                 | Biotin, A647    | RA3-6B2         | BioLegend                 |
| Ter119                | Biotin          | TER-119         | eBioscience               |
| CD3                   | Alexa Fluor 647 | 17A2            | eBioscience               |
| FcεR1α                | APC             | MAR-1           | eBioscience               |
| CD11b                 | APC             | M1/70           | eBioscience               |
| CD117                 | PE-Cy7          | 2B8             | eBioscience               |
| GATA3                 | PE              | TWJ             | eBioscience               |
| KLRG1                 | eFluor 450      | 2F1             | eBioscience               |
| ICOS                  | Biotin          | 7E.17G9         | eBioscience               |
| NK1.1                 | Biotin          | PK136           | eBioscience               |
| Streptavidin          | V500            |                 | BD                        |
| CD16/32<br>(Fc block) | Pure            | 2.4G2           | BioXCell                  |
| RapidSphere<br>beads  | Streptavidin    |                 | Stem Cell<br>Technologies |

**Table S2. Primer sequences**

|                 |                                    |
|-----------------|------------------------------------|
| Porphobilinogen | Fwd: 5'-TGGTGTTCACCTCCCTGAAGG-3'   |
| Deaminase       | Rev: 5'-AAAGACAACAGCATCACAAGGGT-3' |
| Relm-α          | Fwd: 5'-CCATAGAGAGATTATCGTGGA-3'   |
|                 | Rev: 5'-TGGTCGAGTCAACGAGTAAG-3'    |
| Muc5ac          | Fwd: 5'-CTGTGACATTATCCCATAAGCCC-3' |
|                 | Rev: 5'-AAGGGGTATAGCTGGCCTGA-3'    |
